# Supplementary material for: Associations between Children’s Genetic Susceptibility to Obesity, Infant’s Appetite and Parental Feeding Practices in Toddlerhood
Source: MDPI journal article supplement (doi:10.3390/nu13051468), 2021-04-26
Supplement: s1 [file s1]

**Supplemental Table S1. Details regarding multiple imputations**

| Variable                               | Type of variable           | Model used to predict missing data | Missing values |
|----------------------------------------|----------------------------|------------------------------------|----------------|
| Restriction for health                 | Continuous                 | No missing data                    | 0%             |
| Restriction for weight                 | Continuous                 | No missing data                    | 0%             |
| Pressure to eat                        | Continuous                 | No missing data                    | 0%             |
| Food as a reward                       | Continuous                 | No missing data                    | 0%             |
| Emotional feeding                      | Continuous                 | No missing data                    | 0%             |
| Study center                           | Binary                     | No missing data                    | 0%             |
| Maternal age at delivery               | Continuous                 | No missing data                    | 0%             |
| Child sex                              | Binary                     | No missing data                    | 0%             |
| Preterm birth                          | Binary                     | No missing data                    | 0%             |
| Birth weight                           | Continuous                 | No missing data                    | 0%             |
| Indicator of early appetitive traits   | Categorical (3 categories) | No missing data                    | 0%             |
| Any breastfeeding duration             | Categorical (3 categories) | Logistic regression                | 1 (0.07%)      |
| Age at complementary food introduction | Continuous                 | Linear regression (ppm)            | 1 (0.07%)      |
| Appetite at 2 years                    | Categorical (3 categories) | Logistic regression                | 1 (0.07%)      |
| Primiparity                            | Binary                     | Logistic regression                | 2 (0.1%)       |
| Maternal education level               | Categorical (4 categories) | Logistic regression                | 7 (0.5%)       |
| Household income                       | Categorical (4 categories) | Logistic regression                | 9 (0.6%)       |
| Smoking status during pregnancy        | Binary                     | Logistic regression                | 31 (2.2%)      |
| Appetite at 4 months                   | Categorical (3 categories) | Logistic regression                | 34 (2.4%)      |
| Appetite at 8 months                   | Categorical (3 categories) | Logistic regression                | 46 (3.3%)      |
| Appetite at 1 year                     | Categorical (3 categories) | Logistic regression                | 72 (5.1%)      |
| Child BMI-GRS                          | Continuous                 | Linear regression (ppm)            | 435 (31.1%)    |

BMI-GRS, genetic risk score of body mass index

**Supplemental Table S2. Sensitivity analyses: associations between infant's appetite (reference = normal appetite) and parental feeding practice of using food as a reward**

|                                                                            | Food as a reward<br>(Ref=Normal) |        |                   |       |
|----------------------------------------------------------------------------|----------------------------------|--------|-------------------|-------|
|                                                                            | Boys<br>High                     | P      | Girls<br>High     | P     |
| <b>Unadjusted model</b>                                                    |                                  |        |                   |       |
| 4-to-24-month appetite                                                     |                                  | <0.001 |                   | 0.002 |
| N                                                                          | 707                              |        | 651               |       |
| Low appetite                                                               | 2.67 [1.51; 4.69]                |        | 0.54 [0.34; 0.85] |       |
| Normal appetite                                                            | 1 [Ref]                          |        | 1 [Ref]           |       |
| High appetite                                                              | 1.65 [1.06; 2.56]                |        | 1.83 [1.02; 3.29] |       |
| <b>Main analyses *</b>                                                     |                                  |        |                   |       |
| 4-to-24-month appetite                                                     |                                  | 0.001  |                   | 0.007 |
| N                                                                          | 707                              |        | 651               |       |
| Low appetite                                                               | 2.69 [1.50; 4.81]                |        | 0.53 [0.33; 0.86] |       |
| Normal appetite                                                            | 1 [Ref]                          |        | 1 [Ref]           |       |
| High appetite                                                              | 1.58 [1.01; 2.49]                |        | 1.64 [0.89; 3.01] |       |
| <b>Sensitivity analyses *</b>                                              |                                  |        |                   |       |
| 4-to-24-month appetite, without children born preterm                      |                                  | 0.005  |                   | 0.02  |
| N                                                                          | 667                              |        | 617               |       |
| Low appetite                                                               | 2.43 [1.35; 4.38]                |        | 0.58 [0.35; 0.97] |       |
| Normal appetite                                                            | 1 [Ref]                          |        | 1 [Ref]           |       |
| High appetite                                                              | 1.54 [0.95; 2.49]                |        | 1.72 [0.92; 3.20] |       |
| 4-to-24-month appetite, further adjusted for WHO weight-for-length z-score |                                  | 0.001  |                   | 0.008 |
| N                                                                          | 707                              |        | 651               |       |
| Low appetite                                                               | 2.58 [1.43; 4.64]                |        | 0.53 [0.32; 0.86] |       |
| Normal appetite                                                            | 1 [Ref]                          |        | 1 [Ref]           |       |
| High appetite                                                              | 1.64 [1.04; 2.60]                |        | 1.65 [0.89; 3.07] |       |
| 4-to-12-month appetite                                                     |                                  | 0.07   |                   | 0.06  |
| N                                                                          | 707                              |        | 651               |       |
| Low appetite                                                               | 1.93 [0.92; 4.09]                |        | 0.63 [0.36; 1.10] |       |
| Normal appetite                                                            | 1 [Ref]                          |        | 1 [Ref]           |       |
| High appetite                                                              | 1.55 [0.91; 2.63]                |        | 1.89 [0.86; 4.15] |       |
| 4-to-24-month appetite, multiple imputation                                |                                  | 0.001  |                   | 0.004 |
| N                                                                          | 729                              |        | 671               |       |
| Low appetite                                                               | 1.63 [1.10; 2.41]                |        | 0.55 [0.38; 0.78] |       |
| Normal appetite                                                            | 1 [Ref]                          |        | 1 [Ref]           |       |
| High appetite                                                              | 0.98 [0.70; 1.37]                |        | 1.70 [1.13; 2.57] |       |

One model per exposition variable.

Data are odds ratios [95% confidence intervals].

\* Logistic regression analyses adjusted for <sup>a</sup> study center, maternal age at delivery, primiparity, maternal education level, household income, smoking status during pregnancy, birth weight, gestational age, prematurity and any breastfeeding duration.

The interaction between child's sex and infant's appetite was tested for each parental feeding practices and conducted to a stratification on child's sex for food as a reward ( $p_{\text{for interaction}}=0.08$ ).

**Supplemental Table S3. Sensitivity analyses: associations between child's genetic susceptibility to obesity and parental feeding practice of using food as a reward**

|                                                                                 | Food as a reward  |     |
|---------------------------------------------------------------------------------|-------------------|-----|
|                                                                                 | OR [95% CI]       | P   |
| <b>Unadjusted model</b>                                                         |                   |     |
| Child BMI-GRS, per risk allele (n=932)                                          | 1.03 [0.98; 1.08] | 0.3 |
| <b>Main analyses *</b>                                                          |                   |     |
| Child BMI-GRS, per risk allele (n=932)                                          | 1.03 [0.98; 1.09] | 0.3 |
| <b>Sensitivity analyses *</b>                                                   |                   |     |
| Child weighted BMI-GRS, per risk allele (n=932)                                 | 1.02 [0.98; 1.07] | 0.4 |
| Child BMI-GRS without children born preterm, per risk allele (n=894)            | 1.02 [0.97; 1.08] | 0.4 |
| Child BMI-GRS, per risk allele, after multiple imputation (n=1342) <sup>a</sup> | 1.02 [0.97; 1.07] | 0.2 |

One model per exposition variable.

Data are odds ratios [95% confidence intervals].

\* Logistic regression analyses adjusted for study center.

BMI-GRS, genetic risk score of body mass index.

<sup>a</sup>Missing data for child BMI-GRS were only imputed if maternal BMI-GRS was available.

**Supplemental Table S4. Sensitivity analyses: associations between child's appetite (reference = normal appetite) at 1 year and coercive parental feeding practices**

|                          | Restriction for health |     |                      |      | Restriction for weight |      |                     |      | Pressure to eat    |     |
|--------------------------|------------------------|-----|----------------------|------|------------------------|------|---------------------|------|--------------------|-----|
|                          | Boys<br>β [95% CI]     | P   | Girls<br>β [95% CI]  | P    | Boys<br>β [95% CI]     | P    | Girls<br>β [95% CI] | P    | β [95% CI]         | P   |
| Child appetite at 1 year |                        | 0.3 |                      | 0.03 |                        | 0.03 |                     | 0.04 |                    | 0.8 |
| N                        | 682                    |     | 610                  |      | 682                    |      | 610                 |      | 1292               |     |
| Low appetite             | -0.29 [-0.76; 0.17]    |     | -0.42 [-0.74; -0.10] |      | -0.38 [-0.65; -0.10]   |      | -0.16 [-0.34; 0.03] |      | 0.00 [-0.21; 0.20] |     |
| Normal appetite          | 0 [Ref]                |     | 0 [Ref]              |      | 0 [Ref]                |      | 0 [Ref]             |      | 0 [Ref]            |     |
| High appetite            | -0.18 [-0.56; 0.21]    |     | 0.19 [-0.36; 0.74]   |      | 0.02 [-0.21; 0.24]     |      | 0.31 [-0.01; 0.63]  |      | 0.08 [-0.17; 0.33] |     |

Data are β [95% confidence intervals].

Linear regressions adjusted for study center, maternal age at delivery, primiparity, maternal education level, household income, smoking status during pregnancy, child sex - when analyses were not stratified on child sex-, birth weight, gestational age, prematurity and any breastfeeding duration.

**Supplemental Table S5. Sensitivity analyses: associations between child's appetite (reference = normal appetite) at 1 year and other parental feeding practices**

|                          | Food as a reward<br>(Ref=Normal) |     |                   |     | Emotional feeding<br>(Ref=Normal) |     |                   |     |
|--------------------------|----------------------------------|-----|-------------------|-----|-----------------------------------|-----|-------------------|-----|
|                          | Boys<br>High                     | P   | Girls<br>High     | P   | Boys<br>High                      | P   | Girls<br>High     | P   |
| Child appetite at 1 year |                                  | 0.1 |                   | 0.4 |                                   | 0.2 |                   | 0.5 |
| N                        | 682                              |     | 610               |     | 682                               |     | 610               |     |
| Low appetite             | 1.70 [0.64; 4.51]                |     | 0.66 [0.35; 1.28] |     | 1.05 [0.41; 2.69]                 |     | 0.70 [0.37; 1.33] |     |
| Normal appetite          | 1 [Ref]                          |     | 1 [Ref]           |     | 1 [Ref]                           |     | 1 [Ref]           |     |
| High appetite            | 2.16 [0.94; 4.93]                |     | 1.30 [0.41; 4.14] |     | 2.47 [0.97; 6.28]                 |     | 1.37 [0.44; 4.28] |     |

Data are odds ratios [95% confidence intervals].

Logistic regressions adjusted for study center, maternal age at delivery, primiparity, maternal education level, household income, smoking status during pregnancy, birth weight, gestational age, prematurity and any breastfeeding duration

|                           | Item No | Recommendation                                                                                                                                                                                                                                                                                                             | Page No                                                 |
|---------------------------|---------|----------------------------------------------------------------------------------------------------------------------------------------------------------------------------------------------------------------------------------------------------------------------------------------------------------------------------|---------------------------------------------------------|
| <b>Title and abstract</b> | 1       | (a) Indicate the study's design with a commonly used term in the title or the abstract<br>(b) Provide in the abstract an informative and balanced summary of what was done and what was found                                                                                                                              | Title page<br>Title page                                |
| <b>Introduction</b>       |         |                                                                                                                                                                                                                                                                                                                            |                                                         |
| Background/rationale      | 2       | Explain the scientific background and rationale for the investigation being reported                                                                                                                                                                                                                                       | Introduction, paragraphs 1-2                            |
| Objectives                | 3       | State specific objectives, including any prespecified hypotheses                                                                                                                                                                                                                                                           | Introduction, paragraph 3                               |
| <b>Methods</b>            |         |                                                                                                                                                                                                                                                                                                                            |                                                         |
| Study design              | 4       | Present key elements of study design early in the paper                                                                                                                                                                                                                                                                    | Materials and methods, paragraph 2.1                    |
| Setting                   | 5       | Describe the setting, locations, and relevant dates, including periods of recruitment, exposure, follow-up, and data collection                                                                                                                                                                                            | Materials and methods, paragraph 2.1                    |
| Participants              | 6       | (a) Give the eligibility criteria, and the sources and methods of selection of participants. Describe methods of follow-up<br><br>(b) For matched studies, give matching criteria and number of exposed and unexposed                                                                                                      | Materials and methods, paragraph 2.6                    |
| Variables                 | 7       | Clearly define all outcomes, exposures, predictors, potential confounders, and effect modifiers. Give diagnostic criteria, if applicable                                                                                                                                                                                   | Materials and methods, paragraphs 2.2, 2.3, 2.4 and 2.5 |
| Data sources/measurement  | 8*      | For each variable of interest, give sources of data and details of methods of assessment (measurement). Describe comparability of assessment methods if there is more than one group                                                                                                                                       | Materials and methods, paragraphs 2.2, 2.3, 2.4 and 2.5 |
| Bias                      | 9       | Describe any efforts to address potential sources of bias                                                                                                                                                                                                                                                                  |                                                         |
| Study size                | 10      | Explain how the study size was arrived at                                                                                                                                                                                                                                                                                  | Materials and methods, paragraph 2.6                    |
| Quantitative variables    | 11      | Explain how quantitative variables were handled in the analyses. If applicable, describe which groupings were chosen and why                                                                                                                                                                                               | Materials and methods, paragraphs 2.2, 2.3, 2.4 and 2.5 |
| Statistical methods       | 12      | (a) Describe all statistical methods, including those used to control for confounding<br><br>(b) Describe any methods used to examine subgroups and interactions<br>(c) Explain how missing data were addressed<br>(d) If applicable, explain how loss to follow-up was addressed<br>(e) Describe any sensitivity analyses | Materials and methods, paragraph 2.7                    |
| <b>Results</b>            |         |                                                                                                                                                                                                                                                                                                                            |                                                         |
| Participants              | 13*     | (a) Report numbers of individuals at each stage of study—eg numbers potentially eligible, examined for eligibility, confirmed eligible, included in the study, completing follow-up, and analysed<br>(b) Give reasons for non-participation at each stage                                                                  | Figure 1                                                |

|                          |     |                                                                                                                                                                                                                                                                                                                                                                                                                   |                                                                            |
|--------------------------|-----|-------------------------------------------------------------------------------------------------------------------------------------------------------------------------------------------------------------------------------------------------------------------------------------------------------------------------------------------------------------------------------------------------------------------|----------------------------------------------------------------------------|
|                          |     | (c) Consider use of a flow diagram                                                                                                                                                                                                                                                                                                                                                                                |                                                                            |
| Descriptive data         | 14* | (a) Give characteristics of study participants (eg demographic, clinical, social) and information on exposures and potential confounders<br><br>(b) Indicate number of participants with missing data for each variable of interest<br>(c) Summarise follow-up time (eg, average and total amount)                                                                                                                | Results, paragraph 1<br>Tables 1 and 2                                     |
| Outcome data             | 15* | Report numbers of outcome events or summary measures over time                                                                                                                                                                                                                                                                                                                                                    | Tables 1 and 2                                                             |
| Main results             | 16  | (a) Give unadjusted estimates and, if applicable, confounder-adjusted estimates and their precision (eg, 95% confidence interval). Make clear which confounders were adjusted for and why they were included<br><br>(b) Report category boundaries when continuous variables were categorized<br>(c) If relevant, consider translating estimates of relative risk into absolute risk for a meaningful time period | Results, paragraph 3.1 and 3.2<br>Tables 3, to 6                           |
| Other analyses           | 17  | Report other analyses done—eg analyses of subgroups and interactions, and sensitivity analyses                                                                                                                                                                                                                                                                                                                    | Results, paragraph 3.1 and 3.2<br>Tables 3, to 6<br>Suppl. Tables S2 to S5 |
| <b>Discussion</b>        |     |                                                                                                                                                                                                                                                                                                                                                                                                                   |                                                                            |
| Key results              | 18  | Summarise key results with reference to study objectives                                                                                                                                                                                                                                                                                                                                                          | Discussion, paragraph 1                                                    |
| Limitations              | 19  | Discuss limitations of the study, taking into account sources of potential bias or imprecision. Discuss both direction and magnitude of any potential bias                                                                                                                                                                                                                                                        | Discussion, paragraph 5                                                    |
| Interpretation           | 20  | Give a cautious overall interpretation of results considering objectives, limitations, multiplicity of analyses, results from similar studies, and other relevant evidence                                                                                                                                                                                                                                        | Discussion, paragraphs 2 to 4                                              |
| Generalisability         | 21  | Discuss the generalisability (external validity) of the study results                                                                                                                                                                                                                                                                                                                                             | Discussion, paragraph 5                                                    |
| <b>Other information</b> |     |                                                                                                                                                                                                                                                                                                                                                                                                                   |                                                                            |
| Funding                  | 22  | Give the source of funding and the role of the funders for the present study and, if applicable, for the original study on which the present article is based                                                                                                                                                                                                                                                     | Funding section                                                            |

\*Give information separately for exposed and unexposed groups.

**Note:** An Explanation and Elaboration article discusses each checklist item and gives methodological background and published examples of transparent reporting. The STROBE checklist is best used in conjunction with this article (freely available on the Web sites of PLoS Medicine at <http://www.plosmedicine.org/>, Annals of Internal Medicine at <http://www.annals.org/>, and Epidemiology at <http://www.epidem.com/>). Information on the STROBE Initiative is available at <http://www.strobe-statement.org>.
